1 Evolution of sperm morphology in *Daphnia*

2

3 Duneau David<sup>1,4</sup>, Markus Möst<sup>2</sup>, Dieter Ebert<sup>3</sup>

4

5 <sup>1</sup> Université Toulouse 3 Paul Sabatier, CNRS, IRD; UMR5174, EDB (Laboratoire Évolution &  
6 Diversité Biologique); Toulouse, France

7 <sup>2</sup> University of Innsbruck, Department of Ecology, Technikerstrasse 25, 6020 Innsbruck, Austria

8 <sup>3</sup> University of Basel, Department of Environmental Sciences, Zoology, Vesalgasse 1, 4051 Basel,  
9 Switzerland

10 <sup>4</sup> Corresponding author: david.duneau@gmail.com

## 11 Abstract

12 Sperm, the male most fundamental reproductive feature allowing egg fertilization, evolves under  
13 sexual selection. Two components of sperm are mainly under selection, their number and their  
14 morphology (including the associated quality). Here we study the evolution of sperm morphology in  
15 the genus *Daphnia*. Based on microscopic observations of sperm morphologies mapped on a *Daphnia*  
16 phylogeny, we found that increase in sperm length evolved at least twice in *Daphnia*, once in the  
17 *Daphnia sensus lato* clade and once in the *Ctenodaphnia* clade. Furthermore, *Daphnia s.l.* lost the  
18 ability of cell compaction by losing extracellular encapsulation and exposing large filaments. We  
19 discuss the potential reasons for such convergent evolution in sperm morphology.

## 20 Introduction

21 Sexual selection is a form of natural selection acting on mating and fertilization success.  
22 Hence, sperm, the most fundamental male reproductive feature allowing egg fertilization, evolve—at  
23 least in part—under such selection. Two components of sperm are mainly under selection, their  
24 number and their morphology, the later including the associated quality. Males generally release many  
25 gametes, the ejaculate, to fertilize a few eggs. The ejaculate size is known to evolve in response to the  
26 risk of sperm competition for egg fertilization, to cryptic female choice and to female receptacle size  
27 (i.e. the dilution effect) (Roldan, 2019). In contrast, while sperm are considered as one of the most  
28 taxonomically diverse and rapidly evolving cell types (Birkhead *et al.*, 2009; Ramm *et al.*, 2014), the  
29 understanding of the adaptive value of sperm morphology, such as length and shape, remains largely  
30 incomplete (Lüpold & Pitnick, 2018). Sperm length does not necessarily correlate with increased  
31 swimming speed (although it is often the case, see (Tourmente *et al.*, 2011; Rowley *et al.*, 2019)) and  
32 structures not involved in velocity evolve most probably in response to the environment in which  
33 fertilization occurs but the details are rarely, if ever, clear (Lüpold & Pitnick, 2018).

34 *Daphnia* are crustaceans reproducing by cyclical parthenogenesis and as such, egg fertilization is  
35 sporadic, but essential for diapause in freezing and drying habitats and for dispersal. Following periods  
36 of clonal reproduction, during which females only produce genetically identical daughters, and usually  
37 triggered by a change in environmental conditions, some females produce sexual eggs while others  
38 produce males. During mating, generally one male, but sometimes more, attach to the female to  
39 fertilize eggs which will be laid into the female brood pouch after the male(s) departed (Duneau *et al*  
40 in prep.). The brood pouch is a receptacle formed by the carapace and present on the dorsal side of all  
41 *Daphnia* species receiving either clonal or sexual eggs. For the latter, the cuticular structure of the  
42 brood pouch changes to form a protective case which will be released upon molting, creating  
43 genetically diverse egg-banks from which future populations can be established. Fertilization takes  
44 most likely place in this brood pouch (Duneau *et al.* in prep.). However, although there are recordings  
45 of males competing for fertilization in *Daphnia magna* (Duneau *et al.* in prep.), the extend of sperm  
46 competition in this receptacle is unknown. Importantly, a water current generated by the filtering

47 apparatus oxygenates the eggs in the brood pouch (Seidl *et al.*, 2002), and it is likely that many sperm  
48 may be flushed out after the male ejaculated. In this context, males are expected to evolve larger  
49 ejaculates. However, assuming finite resources allocated to sperm production, this may come at the  
50 cost of sperm length (Immler *et al.*, 2011), an important trait in male competition. Thus, males are  
51 likely to evolve persistence traits that allow them to increase the chances of fertilization. Here we  
52 investigate how sperm morphology in *Daphnia* species diverged in a phylogenetic context,  
53 presumably as a response to sexual selection.

54 Although pioneer studies have given key general descriptions to identify the main structures  
55 (Delavault & Berard, 1974; Wingstrand, 1978; Zaffagnini, 1987; Wuerz *et al.*, 2017), only little is  
56 known about sperm morphology in *Daphnia*. All *Anomopoda*, an infraorder including *Daphnia*, have a  
57 vacuolar type of spermatogenesis (Wingstrand, 1978), *i.e.* in the testes, the spermatids are enclosed in  
58 “private” vacuoles in the nutritive cells and are exocytosed into the testicular lumen after they have  
59 decreased strongly in size and matured. After they have compacted, they are generally small, about a  
60 few microns. Sperm of *D. magna* has been more thoroughly studied with recent technology. This  
61 *Ctenodaphnia* species has larger sperm (~10  $\mu\text{m}$ ) encapsulated by an acellular capsule likely  
62 compacting radial arms probably to pack more sperm in the testes (Wuerz *et al.*, 2017). The roles of  
63 the capsule and of the filaments that are only visible surrounding the cell within the vacuole with  
64 electronic microscopy (Wuerz *et al.*, 2017) are unclear. Based on comparison with other models, it has  
65 been proposed that female secretion could dissolve the capsule and the filament could have a role in  
66 the fusion between gametes (Wuerz *et al.*, 2017). Here, we used a robust phylogeny of the Daphnidae  
67 (Adamowicz *et al.*, 2009; Cornetti *et al.*, 2019) and assessed several species representing major clades  
68 within *Daphnia* to better understand the evolution of sperm morphology in this genus.

## 69 Materials and methods

70 Male *Daphnia* were either sampled from female mass cultures in the laboratory, where males  
71 are naturally produced as a consequence of high density, or from females exposed to the hormone  
72 methyl farnesoate (MF, 40nM final concentration) to induce male production. We induced male

73 production for *D. hyalina*, *D. zschokkei*, *D. mendotea*, *D. galeata*, *D. curvirostris* and *D. dentifera* and  
74 collected naturally produced males for *D. similis*, *D. sinensis*, *D. lumholtzi*, *D. carinata*, *D. magna*, *D.*  
75 *hispanica*, *D. dolichocephala*, *D. barbata*, *D. longispina*, *D. pulex* and *D. pulicaria*. Note that *D.*  
76 *hyalina* and *D. zschokkei* are now synonymous of *D. longispina* and should be understood as *D.*  
77 *longispina* ‘*hyalina*’ and *D. longispina* ‘*zschokei*’ (Petrušek *et al.*, 2008), hence we merged them on  
78 the same branch in the cladogram.

79 To collect sperm, we exposed mature males to a 1 % nicotine solution ((-)-Nicotin 162.23 g/mol, from  
80 Carl Roth, Germany) to induce ejaculation as in (Duneau *et al.*, 2012). As only mature spermatozoa  
81 are in the testicular lumen (p11 in Wingstrand, 1978; p277 in Zaffagnini, 1987), this method allowed  
82 us to describe and measure mature sperm and avoid immature ones. Presence of filaments on the  
83 sperm was recorded, but we did not measure their length. Measurements of the longest length of the  
84 sperm were performed with ImageJ (v. 1.5i) using photographs taken under phase contrast light at  
85 magnification 40x. In species with very small sperm (*D. pulex*, *D. pulicaria*, *D. dolichocephala* and *D.*  
86 *barbata*) we paid particularly attention that the sperm were just released from the spermiduct to reduce  
87 the possibility of degradation or to confuse them with other particles. However, it was challenging to  
88 take photographs of them, and the measurement may be less accurate than for the other species. *D.*  
89 *pulex* sperm length is only around 2 µm in length (Xu *et al.*, 2015). All sperm were also observed at  
90 the moment of release from the ejaculatory opening to verify that their shape corresponds to what was  
91 observed later when they settled and were photographed. We also observed sperm morphology in sea  
92 water to confirm that osmolarity was not affecting our results. Drawing of male abdomens with the  
93 genital papilla were taken from published keys (Benzie, 2005; Popova *et al.*, 2016).

## 94 Results

95 Sperm morphology varied greatly among *Daphnia*, ranging from about 2 µm to at least 20 µm  
96 (Figure 1 and supplementary figures 1 and 2). There was a clear phylogenetic signal in sperm length  
97 across *Daphnia*, but length clusters are polyphyletic. Based on recent *Daphnia* phylogenies  
98 (Adamowicz *et al.*, 2009; Cornetti *et al.*, 2019) and the microscopic observations of sperm

99 morphologies, we found that an increase in sperm length evolved at least twice in *Daphnia* (Figure 1),  
100 once in *Daphnia sensus lato* and once in *Ctenodaphnia*. This length variation was probably mostly due  
101 to a difference in sperm compaction by an extracellular capsule. We found that clades leading to the *D.*  
102 *longispina* group have lost entirely this capsule, hence leaving long filaments without protection  
103 (Figure 2, Supplementary figures 1, 2 and 3).

104 *Ceriodaphnia*, our outgroup, have sperm of the vacuolar spermatogenesis type, like *Daphnia* species  
105 and the rest of the infraorder of the *Anomopoda*. Their sperm have been described, based on electron  
106 microscopy, as small (2 to 6  $\mu\text{m}$ ), more or less rod-shaped and strongly compacted in their capsule  
107 (Figure 2A and p25-26 in Wingstrand, 1978). This information based on several *Ceriodaphnia* species  
108 allowed to determine the most parsimonious ancestral *Daphnia* sperm morphology. The *Ctenodaphnia*  
109 group, except for *D. dolichocephala* and *D. barbata* who had compacted and small sperm, evolved  
110 non-compacted and elongated sperm, several times larger than the ancestral morphology (Figure 1 and  
111 2B). A similar adaptation occurred in *Daphnia s. l.* As in (Xu *et al.*, 2015) which reported *Daphnia*  
112 *pulex s. str.* sperm length, *Daphnia* from the *D. pulex* subgroup conserved the small and compacted  
113 sperm morphology, while *D. curvirostris* and sister species from the *D. longispina* species complex  
114 also evolved larger elongated sperm, but not as large as in *Ctenodaphnia* (Figure 1). Additionally, it  
115 seems, that *Daphnia* species from the *D. longispina* species complex lost the extracellular capsule  
116 compacting the sperm and have long filaments with potentially forked structures (Figure 2C). These  
117 filaments can be several times the length of the sperm (not measured here) (Figure 2 and  
118 Supplementary figure 3). In the same ejaculate from a single *D. longispina s. str.* male sperm can  
119 have, on each side, either one long filament or many shorter ones (see Figure 2 and Supp. material). It  
120 has been argued that ejaculate size increases with female receptacle length to compensate for the  
121 dilution effect and that it should be accompanied by a reduction in sperm length. Considering that  
122 most *Ctenodaphnia* are not much larger than *Daphnia s. l.*, it is unlikely that this hypothesis explains  
123 the evolution of sperm morphology in *Daphnia*.

124 We further compared the shape of the male genital papilla across the *Daphnia* species, using drawing  
125 from published keys (Benzie, 2005; Popova *et al.*, 2016) (Figure 1). Most species have no or a very

126 inconspicuous papilla, the biggest exception is the papilla structure present in *D. magna* (Figure 1).  
127 This structure is also found in several species related to *D. magna*, such as *D. atkinsoni*, *D. bolivari*  
128 and *D. mediterranea*, but they are not included in our study (Flössner, 2000; Benzie, 2005).

## 129 Discussion

130 Our assessment of sperm morphology uncovered clearly structured phylogenetic variation in  
131 sperm length and in the presence or absence of long filaments. The reason for this variation is unclear  
132 but may be in part explained with the strength and intensity of post-copulatory sexual selection.  
133 Strength of sexual selection is a function of how often male ejaculates compete for fertilization, in  
134 particular direct sperm competition and sperm competition through cryptic female choice.

135 The frequency of sex in *Daphnia* depends on the species and of the environment, being eventually  
136 under local adaptation (Roulin *et al.*, 2013). In unstable and short-lived habitats, such as small  
137 rockpools or ponds in unstable or strongly seasonal environments, such as deserts and arctic sites, few  
138 asexual generations occur before diapause recommences. In stable environments, such as large lakes  
139 and ponds in temperate mild climatic regions, many asexual generations may occur before the next  
140 sexual generation comes, if it ever comes in a mother's lifetime. Traditionally, the later type received  
141 more attention by *Daphnia* researchers, leading to the wrong impression that sexual reproduction, and  
142 thus the occurrence of males, is generally rare. Therefore, it is difficult to estimate the intensity and  
143 frequency of sexual selection in the system, especially for each species. In certain populations, males  
144 can be periodically abundant, and several males can be found copulating at the same time with a  
145 female (Duneau *et al.*, in prep). It is not clear whether fertilization would occur in the brood pouch or in  
146 the oviduct. However, the fact that most genital papilla are inconspicuous suggest that fertilization is  
147 realized in the brood pouch as the access to the oviduct seems complicated. Thus, cryptic female  
148 choice and male-male competition via sperm competition, both likely to shape the evolution of sperm  
149 morphology, may occur in this female receptacle.

150 By ejaculating in the female receptacle, males face the challenge to have their sperm flushed out, a  
151 phenomenon which could be a form of cryptic female choice. To provide oxygen, the brood pouch is

152 continuously flushed with a stream of water, entering from the caudal end and leaving from the ventral  
153 carapace chamber in a pulsed manner resulting from the rhythmical movements of the limbs (Seidl *et*  
154 *al.*, 2002). This stream might flush out sperm. It is likely that this mechanism selects for males able to  
155 produce a large number of sperm of good quality. Interspecies variations in such cryptic female choice  
156 may or not vary among species, but males in each species may have different features to increase their  
157 chance to be chosen. Sperm may attach and cover the inner lining of the brood pouch, so eggs would  
158 not be expelled and touch the sperm as soon as they are released in the brood pouch. However, there is  
159 no obvious structure supporting that freshly ejaculated sperm can attach to the inner lining. Then, they  
160 may simply increase the number of sperm per ejaculate to increase the chance for few sperm to remain  
161 in the brood pouch. However, as most sperm production is done early in male's life (Wuerz *et al.*,  
162 2017) the total number of sperm is limited by the size of the spermiduct. By limiting the total number  
163 of sperm stored, this constraint may put selection on the amount of compaction allowing to store more  
164 cells in the duct. In *Daphnia*, there is an extracellular compaction process by an extracellular vacuole  
165 before the mature sperm is released into the spermiduct (Wingstrand, 1978). We propose that the  
166 evolutionary changes in sperm length we observed may in part be due to a change in the mechanism of  
167 cell compaction before maturation.

168 Female cryptic choice may select for higher number hence smaller sperm, but sperm of different males  
169 may also compete within the receptacle imposing an additional selection pressure on sperm  
170 morphology. Such sexual selection on sperm morphology through male-male competition will  
171 increase as males are more numerous at a given time and regularly mate at the same time with a  
172 female. The change in sperm size as a result of sperm competition is a commonly seen evolutionary  
173 pattern (see for an example Vielle *et al.* (2016), including extreme examples like giant *Drosophila*  
174 sperm (Lüpold & Pitnick, 2018). However, it is difficult to assess the intensity of sperm competition  
175 based solely on sperm size. In *Caenorhabditis elegans*, experimentally enhanced sperm competition  
176 leads to the evolution of larger sperm (LaMunyon & Ward, 2002). However, in *Drosophila*  
177 *melanogaster*, the competitive advantage was present only in females with relatively long sperm  
178 storage organs (Miller & Pitnick, 2003). When sperm are non-motile, the outcome of sperm



179 competition generally resembles a lottery in which having more tickets than your competitor increases  
180 your chances to win, males are thus expected to invest in sperm production. Assuming finite resources  
181 allocated to sperm production, this may then come at the cost of sperm size (Immler *et al.*, 2011).  
182 When sperm competition is high, the total number of sperm may be maximized balancing the size of  
183 the sperm *per se* and its compaction. However, when sperm competition is low, males may invest less  
184 in sperm size and there may be little benefit from expending energy in mechanisms insuring constant  
185 sperm length (Bauer & Breed, 2006; Immler *et al.*, 2008). However, because it often correlates with  
186 velocity, increase in sperm size can also be selected if sperm are motile at some point of the  
187 fertilization process. It is difficult to assure that *Daphnia* sperm are always non motile. Sperm in the  
188 brood pouch are probably not motile but we observed them on a microscope slide and an *in vivo*  
189 assessment would be necessary to ascertain sperm behavior (Lüpold & Pitnick, 2018). *Daphnia* males  
190 ejaculate into the brood pouch filled with water (the same used for our observation); it is therefore  
191 likely that the absence of motility observed in water on a microscope slide reflects what is happening  
192 in the brood pouch. However, it has been shown that fluid surrounding eggs of externally fertilized  
193 species induced modification to sperm motility (Yoshida *et al.*, 2013). In such scenario, the capsule  
194 might break, the sperm would attach to the oocyte, crawl to an eventual specific fusion site and larger  
195 sperm with filaments may be advantageous in the race to this site.

196 Our phylogenetic analysis of sperm morphology revealed a monophyletic clade (i.e. *D. longispina*  
197 species complex) with sperm exposing filaments of diverse shape and length. In *Daphnia magna*, it  
198 seems that filaments exist and are inside the extracellular vacuole (Wuerz *et al.*, 2017), but they are  
199 difficult to resolve even with electron microscopy and therefore our knowledge about their  
200 ultrastructure is limited. Nevertheless, the vacuole is expected to break before the sperm cell fuse with  
201 the oocyte and filaments to be exposed. *Daphnia* species from the *D. longispina* species complex  
202 evolved non-compacted sperm and the apparent loss of the capsule exposes especially long, sometimes  
203 numerous, filaments. Those exaggerated long structures are unlikely to be flagella and not used to  
204 move towards the eggs as they are extremely flexible and can be forked. But, as sperm features are  
205 expected to be adaptations to their specific fertilization environment (Pitnick *et al.*, 2009), filaments

206 almost certainly have a role in fertilization. If we cannot not exclude that they have a role in  
207 attachment to the brood pouch to avoid being flushed out with the water flow generated by the female,  
208 it is very likely that they have a role in the fusion with the oocyte and potentially with crawling at its  
209 surface to reach a fusion site and win the eventual sperm competition. It may be that with reduced  
210 selection for compaction, readiness to fuse with the oocyte may be favored by the exposure of those  
211 long filaments.

212 As it is often the case when studying the evolution of sperm morphology, it is difficult to clearly  
213 identify the role of sperm features. However, it is certainly evolving driven by the intensity of sexual  
214 selection in the system. *Daphnia* is a cyclical parthenogenetic species, where periods of sexual  
215 reproduction are interspersed with period of asexual reproduction. Cyclical parthenogenetic species,  
216 like *Daphnia*, aphids, and rotifers, alternate sexual and asexual reproduction. The number of asexual  
217 generations in between two sexual reproductive events may be highly variable, but this is important  
218 because the less frequent sexual reproduction is, the lower the average intensity of selection. Thus, one  
219 can wonder how the variation in intensity of sexual selection among cyclical parthenogenetic species  
220 influences the evolution in sperm morphology. Here, the missing information on the sexual process in  
221 *Daphnia* species makes difficult to assess the relative role of cryptic female choice and sperm  
222 competition but both are likely to play a role in the convergent evolution or maybe, even more  
223 interestingly, the conserved evolution of sperm length in *Daphnia*. Altogether, our results support the  
224 idea that sexual selection plays a role in cyclical parthenogenetic invertebrate species and encourage  
225 further investigations.

## 226 Acknowledgements

227 Jürgen Hottinger for help in the laboratory. Jeremias Brand, Vitor Faria, Lukas Schärer and Axel  
228 Wiberg for discussions about the study. DD was supported by the French Laboratory of Excellence  
229 project ‘TULIP’ (ANR-10-LABX-41; ANR-11-IDEX-0002-02). MM was supported by an FWF  
230 Austrian Science Fund stand-alone project (P29667-B25), DE was supported by a grant from the  
231 Swiss National Science Foundation.

## 232 References

- 233 Adamowicz, S.J., Petrusek, A., Colbourne, J.K., Hebert, P.D.N. & Witt, J.D.S. 2009. The scale of  
234 divergence: A phylogenetic appraisal of intercontinental allopatric speciation in a passively  
235 dispersed freshwater zooplankton genus. *Mol. Phylogenet. Evol.* **50**: 423–436.
- 236 Bauer, M. & Breed, W.G. 2006. Variation of sperm head shape and tail length in a species of  
237 Australian hydromyine rodent: The spinifex hopping mouse, *Notomys alexis*. *Reprod. Fertil.*  
238 *Dev.* **18**: 797–805.
- 239 Benzie, J.A.H. 2005. *Cladocera: The genus Daphnia (including Daphniopsis)*. Backhuys Publishers,  
240 Leiden, The Netherlands.
- 241 Birkhead, T.R., Hosken, D.J. & Pitnick, S. 2009. *Sperm biology: an evolutionary perspective*,  
242 Academic P. Elsevier.
- 243 Cornetti, L., Fields, P.D., Van Damme, K. & Ebert, D. 2019. A fossil-calibrated phylogenomic  
244 analysis of *Daphnia* and the Daphniidae. *Mol. Phylogenet. Evol.* **137**: 250–262.
- 245 Delavault, R. & Berard, J.J. 1974. Ultrastructural study of spermatogenesis in *Daphnia magna* Straus  
246 (Entomostraca, Branchiopoda, Cladocerae).
- 247 Duneau, D., Luijckx, P., Ruder, L.F. & Ebert, D. 2012. Sex-specific effects of a parasite evolving in a  
248 female-biased host population. *BMC Biol.* **10**: 104.
- 249 Flössner, D. 2000. *Die Haplopoda und Cladocera (ohne Bosminidae) Mitteleuropas*. Backhuys  
250 Publishers, Leiden, The Netherlands.
- 251 Immler, S., Calhim, S. & Birkhead, T.R. 2008. Increased postcopulatory sexual selection reduces the  
252 intramale variation in sperm design. *Evolution (N. Y.)*. **62**: 1538–1543.
- 253 Immler, S., Pitnick, S., Parker, G.A., Durrant, K.L., Lüpold, S., Calhim, S., *et al.* 2011. Resolving  
254 variation in the reproductive tradeoff between sperm size and number. *Proc. Natl. Acad. Sci. U.*  
255 *S. A.* **108**: 5325–5330.

- 256 LaMunyon, C.W. & Ward, S. 2002. Evolution of larger sperm in response to experimentally increased  
257 sperm competition in *Caenorhabditis elegans*. *Proc. R. Soc. B Biol. Sci.* **269**: 1125–1128.
- 258 Lüpold, S. & Pitnick, S. 2018. Sperm form and function: What do we know about the role of sexual  
259 selection? *Reproduction* **155**: R229–R243.
- 260 Miller, G.T. & Pitnick, S. 2003. Functional significance of seminal receptacle length in *Drosophila*  
261 *melanogaster*. *J. Evol. Biol.* **16**: 114–126.
- 262 Petrussek, A., Hobæk, A., Nilssen, J.P., Skage, M., Černý, M., Brede, N., *et al.* 2008. A taxonomic  
263 reappraisal of the European *Daphnia longispina* complex (Crustacea, Cladocera, Anomopoda).  
264 *Zool. Scr.* **37**: 507–519.
- 265 Pitnick, S., Hosken, D.J. & Birkhead, T.R. 2009. Sperm morphological diversity. In: *Sperm Biology*,  
266 pp. 69–149.
- 267 Popova, E. V., Petrussek, A., Kořínek, V., Mergeay, J., Bekker, E.I., Karabanov, D.P., *et al.* 2016.  
268 Revision of the old world *Daphnia* (Ctenodaphnia) *similis* group (Cladocera: Daphniidae).  
269 *Zootaxa* **4161**: 1–40.
- 270 Ramm, S.A., Schärer, L., Ehmcke, J. & Wistuba, J. 2014. Sperm competition and the evolution of  
271 spermatogenesis. *Mol. Hum. Reprod.* **20**: 1169–1179.
- 272 Roldan, E.R.S. 2019. Sperm competition and the evolution of sperm form and function in mammals.  
273 *Reprod. Domest. Anim.* **54**: 14–21.
- 274 Roulin, A.C., Routtu, J., Hall, M.D., Janicke, T., Colson, I., Haag, C.R., *et al.* 2013. Local adaptation  
275 of sex induction in a facultative sexual crustacean: insights from QTL mapping and natural  
276 populations of *Daphnia magna*. *Mol. Ecol.* **22**: 3567–3579.
- 277 Rowley, A., Locatello, L., Kahrl, A., Rego, M., Boussard, A., Garza-Gisholt, E., *et al.* 2019. Sexual  
278 selection and the evolution of sperm morphology in sharks. *J. Evol. Biol.* **32**: 1027–1035.
- 279 Seidl, M.D., Pirow, R. & Paul, R.J. 2002. Water fleas (*Daphnia magna*) provide a separate ventilatory  
280 mechanism for their brood. *Zoology* **105**: 15–23.

- 281 Tourmente, M., Gomendio, M. & Roldan, E.R.S. 2011. Sperm competition and the evolution of sperm  
282 design in mammals. *BMC Evol. Biol.* **11**: 12.
- 283 Vielle, A., Callemeyn-Torre, N., Gimond, C., Pouillet, N., Gray, J.C., Cutter, A.D., *et al.* 2016.  
284 Convergent evolution of sperm gigantism and the developmental origins of sperm size variability  
285 in *Caenorhabditis* nematodes. *Evolution (N. Y.)*. **70**: 2485–2503.
- 286 Wingstrand, K.G. 1978. Comparative spermatology of the Crustacea Entomostraca; 1, Subclass  
287 Branchiopoda. *Biol. Skr.* **22**: 1–67.
- 288 Wuerz, M., Huebner, E. & Huebner, J. 2017. The morphology of the male reproductive system,  
289 spermatogenesis and the spermatozoon of *Daphnia magna* (Crustacea: Branchiopoda). *J.*  
290 *Morphol.* **278**: 1536–1550.
- 291 Xu, S., Ackerman, M.S., Long, H., Bright, L., Spitze, K., Ramsdell, J.S., *et al.* 2015. A male-specific  
292 genetic map of the microcrustacean *Daphnia pulex* based on single-sperm whole-genome  
293 sequencing. *Genetics* **201**: 31–38.
- 294 Yoshida, M., Hiradate, Y., Sensui, N., Cosson, J. & Morisawa, M. 2013. Species-specificity of sperm  
295 motility activation and chemotaxis: A study on ascidian species. *Biol. Bull.* **224**: 156–165.
- 296 Zaffagnini, F. 1987. Reproduction in *Daphnia*. In: *Daphnia* (R. H. Peters & R. De Bernadi, eds), p.  
297 280. Istituto Italiano di Idrobiologia, Pallanza.

298 **Figure legends**

299 **Figure 1:** Evolution of sperm and genital papilla morphologies in Daphniidae. Phylogeny of  
300 Daphniidea is modified from Cornetti et al. 2019 and Adamowicz et al. 2009. Purple, pink and green  
301 represent respectively the sperm that are small, large with capsule or large with filaments exposed.  
302 Drawings represent the genital papilla of the males (from Benzie 2005 and Popova et al. 2016) and  
303 indicate the atypical exaggerated structure of *D. magna*. Scale bar represent 0,1mm. Photographs show  
304 an example of sperm for each species. The graph represents the difference in sperm length among  
305 males. The mean sperm length was calculated with 2 to 3 ejaculates and is intended to provide a rough  
306 sense of the traits.

307 **Figure 2:** Examples of Daphnia sperm morphologies. A- *Ceriodaphnia laticauda*, ancestral small and  
308 encapsulated elongated sperm (purple color in figure 1). Photo from (Wingstrand, 1978). B- *D.*  
309 *magna*, large and encapsulated elongated sperm of the groups (salmon color in figure 1); C and D - *D.*  
310 *longispina*, two examples of typical sperm non encapsulated and elongated sperm with filaments  
311 (green color in figure 1).

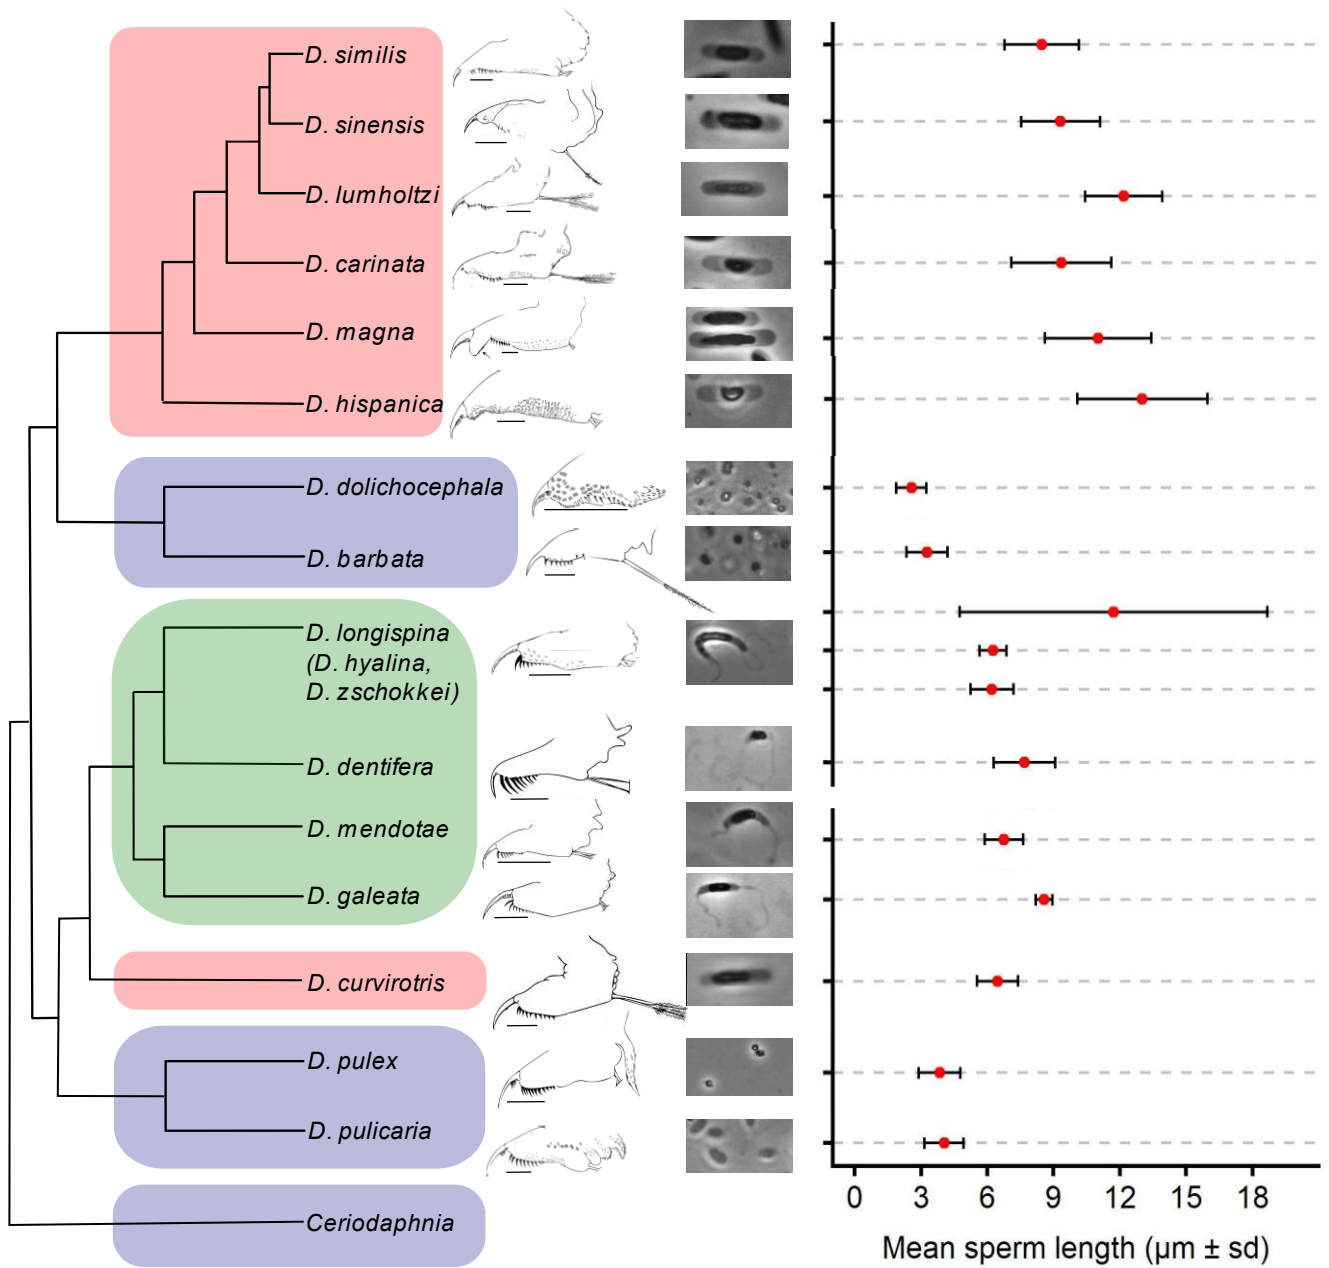

Figure 1: Evolution of sperm and genital papilla morphologies in Daphniidae. Phylogeny of Daphniidea is modified from Cornetti et al. 2019 and Adamowicz et al. 2009. Purple, pink and green represent respectively the sperm that are small, large with capsule or large with filaments exposed. Drawings represent the genital papilla of the males (from Benzie 2005 and Popova et al. 2016) and indicate the atypical exaggerated structure of *D. magna*. Scale bar represent 0,1mm. Photographs show an example of sperm for each species. The graph represents the difference in sperm length among males. The mean sperm length was calculated with 2 to 3 ejaculates and is intended to provide a rough sense of the traits.

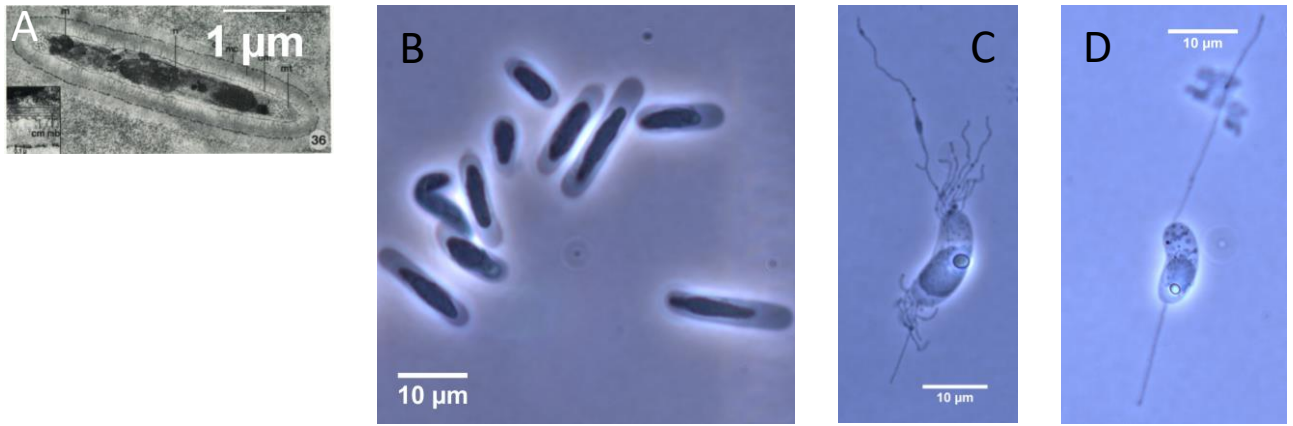

Figure 2: Examples of *Daphnia* sperm morphologies. A- *Ceriodaphnia laticauda*, ancestral small and encapsulated elongated sperm (purple color in figure 1). Photo from (Wingstrand, 1978). B- *D. magna*, large and encapsulated elongated sperm of the groups (salmon color in figure 1); C and D - *D. longispina*, two examples of typical sperm non encapsulated and elongated sperm with filaments (green color in figure 1).
